# Supplementary material
Source: ML conference proceedings conference paper supplement (https://proceedings.neurips.cc/paper_files/paper/2018/hash/51d92be1c60d1db1d2e5e7a07da55b26-Abstract.html)
Supplement: Supplementary file [file 51d92be1c60d1db1d2e5e7a07da55b26-Supplemental.zip]

# Supplementary material

All numbered equations with yellow color box such as (1) are inherited from the main body of manuscript.

## 1 Proof of Theorem 1

**Theorem 1** The optimal objective  $p^*$  to problem (2) is equal to the optimal objective  $p_\delta^*$  to problem (4).

**Proof 1** As problem (4) is the relaxed version of problem (2), we must have  $p_\delta^* \geq p^*$ .

Suppose  $\mathbf{x}^* = \text{vec}(\mathbf{X}^*)$  is the optimal solution to problem (4). We recursively implement the following procedure until there is no 1 in  $\mathbf{x}^*$ . If  $\mathbf{x}_{ia}^* = 1$ , according to the doubly stochastic property, the  $i$ th row and  $a$ th column elements other than  $(i, a)$  element would all be 0. We then remove all the elements in  $\mathbf{A}$  corresponding to node  $i$  in  $\mathcal{G}_1$  and node  $a$  in  $\mathcal{G}_2$ . Finally we can reach a subset of  $\mathbf{x}$  and  $\mathbf{A}$  such that each element in  $\mathbf{x}$  is in the range  $[0, 1)$ . Figure 1 schematically shows how this procedure works from left to right.

However, due to the definition of function  $f_\delta$ , the affinity score over the remaining nodes becomes 0. As  $\mathbf{A}$  is non-negative, any 1 value assignment would result in affinity score no less than 0. Denote the objective value of such assignment  $p_\delta^{\text{assign}}$ , then we have  $p_\delta^* \leq p_\delta^{\text{assign}}$ . On the other hand,  $p_\delta^{\text{assign}}$  is discrete, then we must have  $p_\delta^{\text{assign}} \leq p^*$ .

In summary, we have  $p^* = p_\delta^*$ . QED.

## 2 Proof of Theorem 2

**Theorem 2**  $\lim_{\theta \rightarrow 0} p_\theta^* = p_\delta^*$

**Proof 2** First we define two sets:  $\mathcal{C}_1 = \{\mathbf{x} | \mathbf{H}\mathbf{x} = \mathbf{1}, \mathbf{x} \in [0, 1]^{n^2}\}$ ,  $\mathcal{C}_2 = \{\mathbf{x} | \mathbf{x} \in [0, 1]^{n^2}\}$ . It's easy to observe that  $|p_\theta^* - p_\delta^*| \leq p_1$ , where  $p_1 = \arg \max_{\mathbf{x}} |\mathbf{h}_\theta^\top \mathbf{A} \mathbf{h}_\theta - \mathbf{h}_\delta^\top \mathbf{A} \mathbf{h}_\delta|$  subject to  $\mathcal{C}_1$ . This observation is true because the gap between two separable optimal objectives must be no larger than the maximal gap between the objectives.

We further define  $p_2 = \arg \max_{\mathbf{x}} |\mathbf{h}_\theta^\top \mathbf{A} \mathbf{h}_\theta - \mathbf{h}_\delta^\top \mathbf{A} \mathbf{h}_\delta|$  subject to  $\mathcal{C}_2$ . As  $\mathcal{C}_1 \subset \mathcal{C}_2$ , we must have  $p_1 \leq p_2$ . By rewriting the objective corresponding to  $p_2$  in the following way:

$$\begin{aligned} & \left| \sum_{i,j} \mathbf{A}_{ij} h_\theta(\mathbf{x}_i) h_\theta(\mathbf{x}_j) - \sum_{i,j} \mathbf{A}_{ij} h_\delta(\mathbf{x}_i) h_\delta(\mathbf{x}_j) \right| \\ &= \left| \sum_{i,j} \mathbf{A}_{ij} [(h_\theta(\mathbf{x}_i) - h_\delta(\mathbf{x}_i)) h_\theta(\mathbf{x}_j) + (h_\theta(\mathbf{x}_j) - h_\delta(\mathbf{x}_j)) h_\delta(\mathbf{x}_i)] \right| \end{aligned}$$

Note  $\mathbf{A}$ ,  $h_\theta$  and  $h_\delta$  are all bounded. Additionally,  $h_\theta(\mathbf{x}_i) \rightarrow h_\delta(\mathbf{x}_i)$  and  $h_\theta(\mathbf{x}_j) \rightarrow h_\delta(\mathbf{x}_j)$  when  $\theta \rightarrow 0$  by the third property. Thus  $|p_\theta^* - p_\delta^*| \leq p_1 \leq p_2 \rightarrow 0$ . QED.

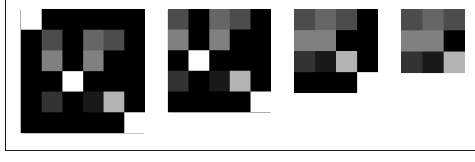

Figure 1: Procedure to remove 1 elements. Here the manipulation on a  $6 \times 6$  matrix is demonstrated schematically. From left to right, we remove a 1 element and corresponding column and row in each step. The rightmost matrix is  $\text{mat}(\mathbf{x}^\dagger)$  with all elements in  $[0, 1]$ .

### 3 Proof of Proposition 1

**Proposition 1** For univariate SF  $h_{\text{Lap}}$ ,  $h_{\text{Poly}}$ , suppose  $p_1^*$  and  $p_2^*$  are the optimal objectives for (5) with  $\theta_1$  and  $\theta_2$ , respectively. Then we have  $p_1^* \geq p_2^*$  if  $0 < \theta_2 < \theta_1$ .

**Proof 3** This can be easily proved by showing  $h_{\text{Lap}}(x; \theta_2) < h_{\text{Lap}}(x; \theta_1)$  and  $h_{\text{Poly}}(x; \theta_2) < h_{\text{Poly}}(x; \theta_1)$  when  $\theta_2 < \theta_1$ . QED.

### 4 Proof of Theorem 3

**Theorem 3** Assume that affinity  $\mathbf{A}$  is positive definite. If the univariate SF  $h_\theta(x) \leq x$  on  $[0, 1]$ , then the global maxima of problem (2), which is discrete, must also be the global maxima of problem (5).

**Proof 4** As shown in [1], whenever affinity  $\mathbf{A}$  is positive definite, the global maximum of problem (3) is a permutation. In this case, the optimum to (3) is also optimum to (2). Denote  $\mathbf{y}^*$  the optimal permutation to (3). As  $\mathbf{y}^*$  is doubly stochastic, it must also satisfy the same constraints in problem (5). Let  $p_1$  be the objective of problem (5) w.r.t.  $\mathbf{y}^*$  – Note  $p_1$  is the optimal objective of problem (3). Assume there exists an optima  $\mathbf{x}_\theta^* \neq \mathbf{y}^*$  to problem (5) with corresponding objective  $p_2$ . As  $p_2$  is optimal, we have  $p_2 \geq p_1$ . Let  $\mathbf{y}_\theta = \mathbf{h}_\theta(\mathbf{x}_\theta^*)$ . As  $h_\theta(x) \leq x$ , we must have  $\mathbf{x}_\theta^* \geq \mathbf{y}_\theta \geq \mathbf{0}$ . Denote  $p_3$  the objective score of (3) by substituting  $\mathbf{x}_\theta^*$ . Since  $\mathbf{A}$  is non-negative,  $\mathbf{x}_\theta^* \geq \mathbf{y}_\theta$  and  $\mathbf{x}_\theta^*, \mathbf{y}_\theta \geq \mathbf{0}$ , we have  $p_3 \geq p_2$ . In summary,  $p_3 \geq p_1$ . However,  $p_1$  is the global optimal objective of (3). Thus the inequality leads to contradiction. The equality exists only when the global optimum of (5) is  $\mathbf{y}^*$ . QED.

### 5 Proof of Proposition 2

**Proposition 2** Assume affinity  $\mathbf{A}$  is positive/negative semi-definite, then as long as the univariate SF  $h_\theta$  is convex, the objective of (5) is convex/concave.

**Proof 5** Consider problem (5), we prove this theorem by checking the property of the Hessian with respect to  $\mathbf{x}$ . As we have obtained the gradient  $2\mathbf{GAh}_\theta$  of the objective in (5) with respect to  $\mathbf{x}$ , we calculate the Hessian by taking the derivative once again. After some mathematical manipulations, we have  $\nabla^2 \mathbf{x} = 2\mathbf{AK}$ , where

$$\mathbf{K} = \text{diag} \left( \left[ \left( \frac{\partial h_\theta}{\partial \mathbf{x}_1} \right)^2 + h_\theta(\mathbf{x}_1) \frac{\partial^2 h_\theta}{\partial \mathbf{x}_1^2}, \dots, \left( \frac{\partial h_\theta}{\partial \mathbf{x}_{n^2}} \right)^2 + h_\theta(\mathbf{x}_{n^2}) \frac{\partial^2 h_\theta}{\partial \mathbf{x}_{n^2}^2} \right]^\top \right) \quad (1)$$

It is easy to show that  $(\partial h_\theta / \partial \mathbf{x}_i)^2$  and  $h_\theta(\mathbf{x}_i)$  are non-negative according to Definition 1. As  $h_\theta$  is convex, its second order derivative must also be non-negative. Matrix  $\mathbf{K}$  is positive semi-definite. Thus the convexity/concavity of  $\mathbf{A}$  is preserved after multiplying  $\mathbf{K}$ . QED.

## 6 Proof of Proposition 3

**Proposition 3** Assume affinity matrix  $\mathbf{A}$  is positive definite and univariate SF  $h_\theta$  is convex. The optimal value to the following problem is:

$$E_{conv} = \max_{\mathbf{x}} \mathbf{h}_\theta^\top \mathbf{A}^\dagger \mathbf{h}_\theta \quad (2)$$

Then there exists a permutation  $\mathbf{x}^*$ , s.t.  $E_{conv} - E(\mathbf{x}^*) \leq n\lambda$  where  $E(\mathbf{x}^*)$  is the objective value w.r.t. problem (5).

**Proof 6** First for any convex univariate SF  $h_\theta$  in range  $[0, 1]$ , we have  $h_\theta(x) \leq x$ . Under the assumption in the theorem, given  $\hat{\mathbf{x}}$  the optima to problem (5), we can obtain an optimal discrete  $\mathbf{y}$  according to the sampling procedure in Theorem 1. The optimal objective of (5) can be written as:

$$E_{conv}(\mathbf{y}) = \sum_{i \neq j, a \neq b} \mathbf{A}_{ij:ab} h_\theta(\mathbf{y}_{ia}) h_\theta(\mathbf{y}_{jb}) + \sum_{i,a} (\mathbf{A}_{ii:aa} + \lambda) h_\theta^2(\mathbf{y}_{ia}) \quad (3)$$

Besides, by substituting  $\mathbf{y}$  into problem (5) we obtain:

$$E(\mathbf{y}) = \sum_{i,j,a,b} \mathbf{A}_{ij:ab} h_\theta(\mathbf{y}_{ia}) h_\theta(\mathbf{y}_{jb}) \quad (4)$$

By subtracting Equation (4) from (3) we have:

$$E_{conv}(\mathbf{y}) - E(\mathbf{y}) = \lambda \sum_{i,a} h_\theta^2(\mathbf{y}_{ia}) \quad (5)$$

As  $\text{mat}(\mathbf{y}) \in \{0, 1\}^{n^2}$  is a permutation hence  $h_\theta(\mathbf{y}_{ia}) = \mathbf{y}_{ia}$ , we have  $\lambda \sum_{i,a} h_\theta^2(\mathbf{y}_{ia}) = n\lambda$ . Then there exists at least one permutation  $\mathbf{x}^*$  satisfying the condition. QED.

## References

- [1] A. Yuille and J. Kosowsky, "Statistical physics algorithms that converge," *Neural Computation*, vol. 6, pp. 341–356, 1994.
